# Supplementary material
Source: ML conference proceedings conference paper supplement (https://proceedings.mlr.press/v119/nguyen20e.html)
Supplement: Supplementary file 1 [file nguyen20e-supp.pdf]

---

## Appendix – Robust Bayesian Classification Using an Optimistic Score Ratio

---

Viet Anh Nguyen<sup>1</sup> Nian Si<sup>1</sup> Jose Blanchet<sup>1</sup>

### A. Proof of Section 1

*Proof of Proposition 1.1.* To ease the exposition, we use the following notational shorthands  $\mathbb{B}_c = \mathbb{B}_{\rho_c}(\widehat{\mathbb{P}}_c) \cap \mathcal{P}$  for  $c \in \{0, 1\}$  and

$$f_c^{\max}(x) = \sup_{f_c \in \mathbb{B}_c} f_c(x), \quad f_c^{\min}(x) = \inf_{f_c \in \mathbb{B}_c} f_c(x) \quad \forall c \in \{0, 1\}.$$

If action  $a = 1$  is chosen, then the worst-case probability of mis-classification is

$$\begin{aligned} \sup_{\mathbb{P} \in \mathcal{B}} \mathbb{P}(Y = 0 | X = x) &= \begin{cases} \sup & \frac{f_0(x)\pi_0}{f_0(x)\pi_0 + f_1(x)\pi_1} \\ \text{s. t.} & f_0 \in \mathbb{B}_0, f_1 \in \mathbb{B}_1 \end{cases} \\ &= \sup_{f_0 \in \mathbb{B}_0} \sup_{f_1 \in \mathbb{B}_1} \frac{f_0(x)\pi_0}{f_0(x)\pi_0 + f_1(x)\pi_1} \\ &= \sup_{f_0 \in \mathbb{B}_0} \frac{f_0(x)\pi_0}{f_0(x)\pi_0 + f_1^{\min}(x)\pi_1} \end{aligned} \tag{A.1a}$$

$$= \frac{f_0^{\max}(x)\pi_0}{f_0^{\max}(x)\pi_0 + f_1^{\min}(x)\pi_1}, \tag{A.1b}$$

where equality (A.1a) holds because  $\pi_1 > 0$ , thus for any  $f_0 \in \mathbb{B}_0$ , the optimal choice of  $f_1$  for the inner supremum problem will minimize  $f_1(x)$  over all  $f_1 \in \mathbb{B}_1$ . Equality (A.1b) holds because  $f_1^{\min}(x)\pi_1 > 0$ , thus it is optimal to choose  $f_0$  that maximizes  $f_0(x)$  over all  $f_0 \in \mathbb{B}_0$ . Using similar lines of arguments, if action  $a = 0$  is chosen, then the worst-case probability of mis-classification is

$$\begin{aligned} \sup_{\mathbb{P} \in \mathcal{B}} \mathbb{P}(Y = 1 | X = x) &= \begin{cases} \sup & \frac{f_1(x)\pi_1}{f_0(x)\pi_0 + f_1(x)\pi_1} \\ \text{s. t.} & f_0 \in \mathbb{B}_0, f_1 \in \mathbb{B}_1 \end{cases} \\ &= \frac{f_1^{\max}(x)\pi_1}{f_0^{\min}(x)\pi_0 + f_1^{\max}(x)\pi_1}. \end{aligned}$$

Thus, by comparing the two values of the worst-case probability, action  $a = 1$  is optimal whenever

$$\frac{f_0^{\max}(x)\pi_0}{f_0^{\max}(x)\pi_0 + f_1^{\min}(x)\pi_1} \leq \frac{f_1^{\max}(x)\pi_1}{f_0^{\min}(x)\pi_0 + f_1^{\max}(x)\pi_1},$$

which in turn is equivalent to the condition

$$\frac{f_1^{\max}(x)}{f_0^{\max}(x)} \geq \frac{f_0^{\min}(x)\pi_0^2}{f_1^{\min}(x)\pi_1^2}. \tag{A.2}$$

By setting the right-hand side of (A.2) to a threshold  $\tau(x) \in \mathbb{R}_+$ , we arrive at the postulated result.  $\square$

---

<sup>1</sup>Stanford University. Correspondence to: Viet Anh Nguyen <viet-anh.nguyen@stanford.edu>.

As the proof reveals in (A.2), the optimal threshold  $\tau(x)$  in the statement of Proposition 1.1 admits an explicit expression

$$\tau(x) = \frac{f_0^{\min}(x)\pi_0^2}{f_1^{\min}(x)\pi_1^2}.$$

This value  $\tau(x)$  can be found by evaluating the minimum likelihood values  $f_0^{\min}(x)$  and  $f_1^{\min}(x)$ . Unfortunately, it remains intractable to find the exact values of  $f_0^{\min}(x)$  and  $f_1^{\min}(x)$ . To demonstrate this fact, we consider the Gaussian parametric setting as in Section 4, and evaluating the minimum likelihood in this case is equivalent to solving

$$\begin{aligned} \min \quad & -(\mu - x)^\top \Sigma^{-1}(\mu - x) - \log \det \Sigma \\ \text{s. t.} \quad & \mu \in \mathbb{R}^d, \Sigma \in \mathbb{S}_{++}^d \\ & (\mu - \hat{\mu})^\top \Sigma^{-1}(\mu - \hat{\mu}) + \text{Tr}[\hat{\Sigma}\Sigma^{-1}] - \log \det \hat{\Sigma}\Sigma^{-1} - d \leq \rho \end{aligned} \quad (\text{A.3})$$

for some  $\hat{\mu} \in \mathbb{R}^d$ ,  $\hat{\Sigma} \in \mathbb{S}_{++}^d$  and  $\rho \geq 0$ . Problem (A.3) is the minimization counterpart of the maximization problem (11a), it is also non-convex, however, we are not aware of any tractable approach to solve (A.3).

## B. Proofs of Section 2

*Proof of Theorem 2.2.* Throughout this proof, we use  $\xrightarrow{\text{dist.}}$  and  $\xrightarrow{p.}$  to denote the convergence in distribution and in probability, respectively. For  $n$  sufficiently big,  $\hat{\Sigma}_n$  defined as in (7) is invertible with probability 1. In this case, we find

$$\begin{aligned} \mathbb{D}((\hat{\mu}_n, \hat{\Sigma}_n) \parallel (m, S)) &= \text{Tr}[\hat{\Sigma}_n S^{-1}] + (m - \hat{\mu}_n)^\top S^{-1}(m - \hat{\mu}_n) - d - \log \det(\hat{\Sigma}_n S^{-1}) \\ &= \frac{1}{n} \sum_{t=1}^n \hat{\eta}_t^\top \hat{\eta}_t - d - \log \det(S^{-\frac{1}{2}} \hat{\Sigma}_n S^{-\frac{1}{2}}), \end{aligned} \quad (\text{A.4})$$

where  $\hat{\eta}_t = S^{-\frac{1}{2}}(\hat{\xi}_t - m)$  is the isotropic transformation of  $\hat{\xi}_t$  for each  $t = 1, \dots, n$ . Furthermore, denote by  $\bar{\mu}_n$  the sample average of  $\hat{\eta}_1, \dots, \hat{\eta}_n$  defined as

$$\bar{\mu}_n = \frac{1}{n} \sum_{t=1}^n \hat{\eta}_t = S^{-\frac{1}{2}}(\hat{\mu}_n - m).$$

By adding and subtracting  $\log \det(n^{-1} \sum_{t=1}^n \hat{\eta}_t \hat{\eta}_t^\top)$  into (A.4), we have

$$\begin{aligned} \mathbb{D}((\hat{\mu}_n, \hat{\Sigma}_n) \parallel (m, S)) &= \\ &= \underbrace{\left( \log \det \left( \frac{1}{n} \sum_{t=1}^n \hat{\eta}_t \hat{\eta}_t^\top \right) - \log \det(S^{-\frac{1}{2}} \hat{\Sigma}_n S^{-\frac{1}{2}}) \right)}_{(\text{A})} + \underbrace{\left( \frac{1}{n} \sum_{t=1}^n \hat{\eta}_t^\top \hat{\eta}_t - d - \log \det \left( \frac{1}{n} \sum_{t=1}^n \hat{\eta}_t \hat{\eta}_t^\top \right) \right)}_{(\text{B})}. \end{aligned}$$

We analyze the 2 terms (A) and (B) separately. First, rewrite

$$\begin{aligned} S^{-\frac{1}{2}} \hat{\Sigma}_n S^{-\frac{1}{2}} &= S^{-\frac{1}{2}} \left( \frac{1}{n} \sum_{t=1}^n (\hat{\xi}_t - \hat{\mu}_n)(\hat{\xi}_t - \hat{\mu}_n)^\top \right) S^{-\frac{1}{2}} \\ &= S^{-\frac{1}{2}} \left( \frac{1}{n} \sum_{t=1}^n (\hat{\xi}_t - m + m - \hat{\mu}_n)(\hat{\xi}_t - m + m - \hat{\mu}_n)^\top \right) S^{-\frac{1}{2}} \\ &= \frac{1}{n} \sum_{t=1}^n (\hat{\eta}_t \hat{\eta}_t^\top + S^{-\frac{1}{2}}(m - \hat{\mu}_n) \hat{\eta}_t^\top + \hat{\eta}_t (m - \hat{\mu}_n)^\top S^{-\frac{1}{2}} + S^{-\frac{1}{2}}(m - \hat{\mu}_n)(m - \hat{\mu}_n)^\top S^{-\frac{1}{2}}) \\ &= \frac{1}{n} \sum_{t=1}^n (\hat{\eta}_t \hat{\eta}_t^\top - \bar{\mu}_n \hat{\eta}_t^\top - \hat{\eta}_t \bar{\mu}_n^\top + \bar{\mu}_n \bar{\mu}_n^\top) \\ &= \left( \frac{1}{n} \sum_{t=1}^n \hat{\eta}_t \hat{\eta}_t^\top \right) - \bar{\mu}_n \bar{\mu}_n^\top. \end{aligned}$$

Then, (A) becomes

$$\log \det \left( \frac{1}{n} \sum_{t=1}^n \hat{\eta}_t \hat{\eta}_t^\top \right) - \log \det (S^{-\frac{1}{2}} \hat{\Sigma}_n S^{-\frac{1}{2}}) = - \log \det \left( I_d - \left( \frac{1}{n} \sum_{t=1}^n \hat{\eta}_t \hat{\eta}_t^\top \right)^{-1} (\bar{\mu}_n \bar{\mu}_n^\top) \right).$$

By the weak law of large numbers, as  $n \uparrow \infty$ , we find

$$\frac{1}{n} \sum_{t=1}^n \hat{\eta}_t \hat{\eta}_t^\top \xrightarrow{p.} I_d \quad \text{and} \quad \frac{1}{n} \sum_{t=1}^n \hat{\eta}_t \xrightarrow{p.} 0.$$

By the central limit theorem, we find as  $n \uparrow \infty$

$$\sqrt{n} \bar{\mu}_n \xrightarrow{dist.} H, \quad \sqrt{n} \left( \frac{1}{n} \sum_{t=1}^n \hat{\eta}_t \hat{\eta}_t^\top - I_d \right) \xrightarrow{dist.} Z,$$

where the random vector  $H$  and the random matrix  $Z$  are defined as in the statement of the theorem. By Slutsky's theorem (van der Vaart, 1998, Theorem 2.8), we find

$$n \left( \frac{1}{n} \sum_{t=1}^n \hat{\eta}_t \hat{\eta}_t^\top \right)^{-1} (\bar{\mu}_n \bar{\mu}_n^\top) \xrightarrow{dist.} H H^\top.$$

By the delta method (van der Vaart, 1998, Theorem 3.1), we have

$$n \times \underbrace{\left( \log \det \left( \frac{1}{n} \sum_{t=1}^n \hat{\eta}_t \hat{\eta}_t^\top \right) - \log \det (S^{-\frac{1}{2}} \hat{\Sigma}_n S^{-\frac{1}{2}}) \right)}_{(A)} \xrightarrow{dist.} \text{Tr} [H H^\top] = H^\top H. \quad (\text{A.5})$$

Now, we are ready to analyze (B). Using a Taylor expansion for the log-determinant function around  $I_d$ , we find

$$\begin{aligned} & \log \det \left( \frac{1}{n} \sum_{t=1}^n \hat{\eta}_t \hat{\eta}_t^\top \right) \\ &= \log \det (I_d) + \text{Tr} \left[ \left( \frac{1}{n} \sum_{t=1}^n \hat{\eta}_t \hat{\eta}_t^\top - I_d \right) \right] - \frac{1}{2} \text{Tr} \left[ \left( \frac{1}{n} \sum_{t=1}^n \hat{\eta}_t \hat{\eta}_t^\top - I_d \right)^2 \right] + o \left( \text{Tr} \left[ \left( \frac{1}{n} \sum_{t=1}^n \hat{\eta}_t \hat{\eta}_t^\top - I_d \right)^2 \right] \right). \end{aligned}$$

Therefore, by the second-order delta method, we have

$$n \times \underbrace{\left( \frac{1}{n} \sum_{t=1}^n \hat{\eta}_t^\top \hat{\eta}_t - d - \log \det \left( \frac{1}{n} \sum_{t=1}^n \hat{\eta}_t \hat{\eta}_t^\top \right) \right)}_{(B)} \xrightarrow{dist.} \frac{1}{2} \text{Tr} [Z^2]. \quad (\text{A.6})$$

Finally, by combining the limits from (A.5) and (A.6), we obtain the postulated result.  $\square$

*Proof of Corollary 2.3.* From Theorem 2.2, we have as  $n \uparrow \infty$

$$n \times \frac{1}{2} \text{KL} (\mathcal{N}(\hat{\mu}_n, \hat{\Sigma}_n) \parallel \mathcal{N}(m, S)) = n \times \mathbb{D}((\hat{\mu}_n, \hat{\Sigma}_n) \parallel (m, S)) \rightarrow H^\top H + \frac{1}{2} \text{Tr} [Z^2] \quad \text{in distribution,}$$

where the random vector  $H$  and the random matrix  $Z$  are defined as in the statement of Theorem 2.2. In the Gaussian setting, the elements of the isotropic random vector  $\eta$  are i.i.d. standard univariate normal random variables. Therefore, we have

$$\text{cov}(Z_{jk}, Z_{j'k'}) = \begin{cases} \mathbb{E}_{\mathbb{P}} \left[ (\eta_j)^4 \right] - 1 & \text{if } j = k = j' = k', \\ 1 & \text{if } j < k, (j = j', k = k' \text{ or } j = k', j' = k), \\ 0 & \text{otherwise.} \end{cases}$$

Recall that  $\mathbb{E}_{\mathbb{P}} \left[ (\eta_j)^4 \right] = 3$ , which gives  $\text{cov}(Z_{jj}, Z_{jj}) = 2$ . Hence,  $\frac{1}{2} \text{Tr} [Z^2]$  follows  $\chi^2(d(d+1)/2)$  and  $H^\top H$  follows  $\chi^2(d)$ . Finally, since  $H$  and  $Z$  are independent in the Gaussian case, we have  $H^\top H + \frac{1}{2} \text{Tr} [Z^2]$  follows  $\chi^2(d) + \chi^2(d(d+1)/2) = \chi^2(d(d+3)/2)$ .  $\square$

### C. Proofs of Section 3

We first prove the compactness property of the uncertainty set  $\mathcal{U}_\rho(\hat{\mu}, \hat{\Sigma})$ .

**Lemma C.1** (Compactness of  $\mathcal{U}_\rho(\hat{\mu}, \hat{\Sigma})$ ). *For any  $\hat{\mu} \in \mathbb{R}^d$ ,  $\hat{\Sigma} \in \mathbb{S}_{++}^d$  and  $\rho \in \mathbb{R}_+$ , the set  $\mathcal{U}_\rho(\hat{\mu}, \hat{\Sigma})$  written as*

$$\mathcal{U}_\rho(\hat{\mu}, \hat{\Sigma}) = \{(\mu, \Sigma) \in \mathbb{R}^d \times \mathbb{S}_{++}^d : \text{Tr}[\hat{\Sigma}\Sigma^{-1}] - \log \det(\hat{\Sigma}\Sigma^{-1}) - d + (\mu - \hat{\mu})^\top \Sigma^{-1}(\mu - \hat{\mu}) \leq \rho\}$$

is compact.

*Proof of Lemma C.1.* If  $\rho = 0$  then  $\mathcal{U}_\rho(\hat{\mu}, \hat{\Sigma})$  is a singleton  $\{(\hat{\mu}, \hat{\Sigma})\}$  and the claim holds trivially. For the rest of the proof, we consider when  $\rho > 0$ . Pick an arbitrary  $(\mu, \Sigma) \in \mathcal{U}_\rho(\hat{\mu}, \hat{\Sigma})$ , it is obvious that  $\Sigma$  should satisfy

$$\text{Tr}[\hat{\Sigma}^{\frac{1}{2}}\Sigma^{-1}\hat{\Sigma}^{\frac{1}{2}}] - \log \det(\hat{\Sigma}^{\frac{1}{2}}\Sigma^{-1}\hat{\Sigma}^{\frac{1}{2}}) - d \leq \rho,$$

which implies that  $\Sigma$  is bounded. To see this, suppose that  $\{\Sigma_k\}_{k \in \mathbb{N}}$  is a sequence of positive definite matrices and  $\{\sigma_k\}_{k \in \mathbb{N}}$  is the corresponding sequence of the minimum eigenvalues of  $\{\hat{\Sigma}^{-\frac{1}{2}}\Sigma_k^{-1}\hat{\Sigma}^{-\frac{1}{2}}\}_{k \in \mathbb{N}}$ . Because the function  $\sigma \mapsto \sigma - \log \sigma - 1$  is non-negative for every  $\sigma > 0$ , we find

$$\text{Tr}[\hat{\Sigma}^{\frac{1}{2}}\Sigma_k^{-1}\hat{\Sigma}^{\frac{1}{2}}] - \log \det(\hat{\Sigma}^{\frac{1}{2}}\Sigma_k^{-1}\hat{\Sigma}^{\frac{1}{2}}) - d \geq \sigma_k - \log \sigma_k - 1.$$

If  $\Sigma_k$  tends to infinity, then  $\sigma_k$  tends to 0, and in this case  $\sigma_k - \log \sigma_k - 1 \rightarrow +\infty$ . This implies that  $\Sigma$  should be bounded in the sense that  $\Sigma \preceq \bar{\sigma}I_d$  for some finite positive constant  $\bar{\sigma}$ . Using an analogous argument, we can show that  $\Sigma$  is lower bounded in the sense that  $\Sigma \succeq \underline{\sigma}I_d$  for some finite positive constant  $\underline{\sigma}$ . As a consequence,  $\mu$  is also bounded because  $\mu$  should satisfy  $\underline{\sigma}\|\mu - \hat{\mu}\|_2^2 \leq \rho$ . We now can rewrite  $\mathcal{U}_\rho(\hat{\mu}, \hat{\Sigma})$  as

$$\mathcal{U}_\rho(\hat{\mu}, \hat{\Sigma}) = \{(\mu, \Sigma) \in \mathbb{R}^d \times \mathbb{S}_{++}^d : \underline{\sigma}\|\mu - \hat{\mu}\|_2^2 \leq \rho, \underline{\sigma}I_d \preceq \Sigma \preceq \bar{\sigma}I_d, \mathbb{D}((\hat{\mu}, \hat{\Sigma}) \parallel (\mu, \Sigma)) \leq \rho\},$$

which implies that  $\mathcal{U}_\rho(\hat{\mu}, \hat{\Sigma})$  is a closed set because  $\mathbb{D}((\hat{\mu}, \hat{\Sigma}) \parallel (\cdot, \cdot))$  is a continuous function over  $(\mu, \Sigma)$  when  $\Sigma$  ranges over  $\underline{\sigma}I_d \preceq \Sigma \preceq \bar{\sigma}I_d$ . This observation coupled with the boundedness of  $(\mu, \Sigma)$  established previously completes the proof.  $\square$

For a fixed  $\hat{\mu} \in \mathbb{R}^d$ ,  $x \in \mathbb{R}^d$  and  $\varepsilon \in \mathbb{R}_+$ , define the following function  $g : \mathbb{S}_{++}^d \rightarrow \mathbb{R}_+$  as

$$g(\Omega) \triangleq \begin{cases} \min & (\mu - x)^\top \Omega (\mu - x) \\ \text{s. t.} & \mu \in \mathbb{R}^d, (\mu - \hat{\mu})^\top \Omega (\mu - \hat{\mu}) \leq \varepsilon, \end{cases} \quad (\text{A.7})$$

where the dependence of  $g$  on  $\hat{\mu}$ ,  $x$  and  $\varepsilon$  has been made implicit to avoid clutter. The objective function of problem (A.7) is continuous in  $\mu$  and the feasible set of problem (A.7) is compact because  $\Omega \in \mathbb{S}_{++}^d$ , which justify the minimization operator of problem (A.7). The next lemma asserts that the value  $g(\Omega)$  coincides with the optimal value of a univariate convex optimization problem.

**Lemma C.2** (Reformulation of  $g$ ). *For any  $\hat{\mu} \in \mathbb{R}^d$ ,  $x \in \mathbb{R}^d$ ,  $\varepsilon \in \mathbb{R}_+$  and  $\Omega \in \mathbb{S}_{++}^d$ , the value  $g(\Omega)$  coincides with the optimal value of the univariate convex optimization problem*

$$\max_{\lambda \geq 0} \left\{ \frac{\lambda}{1 + \lambda} (x - \hat{\mu})^\top \Omega (x - \hat{\mu}) - \lambda \varepsilon \right\}. \quad (\text{A.8})$$

Moreover, denote by  $\lambda^*$  the unique optimal solution of the maximization problem (A.8), then the unique minimizer  $\mu^*$  of problem (A.7) is  $\mu^* = (x + \lambda^* \hat{\mu}) / (1 + \lambda^*)$ . Furthermore, we have

$$\begin{cases} \lambda^* = 0, g(\Omega) = 0 & \text{if } \varepsilon \geq (x - \hat{\mu})^\top \Omega (x - \hat{\mu}), \\ \lambda^* = (\sqrt{\varepsilon(x - \hat{\mu})^\top \Omega (x - \hat{\mu})} - \varepsilon) / \varepsilon, g(\Omega) = (\sqrt{\varepsilon} - \sqrt{(x - \hat{\mu})^\top \Omega (x - \hat{\mu})})^2 & \text{otherwise.} \end{cases}$$

*Proof of Lemma C.2.* Using a change of variables  $y \leftarrow \mu - \hat{\mu}$  and a change of parameters  $w \leftarrow x - \hat{\mu}$ , problem (A.7) can be recast in the following equivalent form

$$g(\Omega) = \begin{cases} \min & (y - w)^\top \Omega (y - w) \\ \text{s. t.} & y \in \mathbb{R}^d, y^\top \Omega y \leq \varepsilon, \end{cases} \quad (\text{A.9})$$

which is a convex optimization problem. Assume momentarily that  $\varepsilon > 0$ . By invoking a duality argument, we find

$$\begin{aligned} g(\Omega) &= \min_y \max_{\lambda \geq 0} (y - w)^\top \Omega (y - w) + \lambda (y^\top \Omega y - \varepsilon) \\ &= \max_{\lambda \geq 0} w^\top \Omega w - \lambda \varepsilon + \min_y \{(1 + \lambda) y^\top \Omega y - 2y^\top \Omega w\} \end{aligned} \quad (\text{A.10a})$$

$$= \max_{\lambda \geq 0} \frac{\lambda}{1 + \lambda} w^\top \Omega w - \lambda \varepsilon, \quad (\text{A.10b})$$

where the interchanging of the inf-sup operators are justified because the feasible set of the primal problem (A.9) is non-empty and compact (Bertsekas, 2009, Proposition 5.5.4). For any  $\lambda \geq 0$ , the minimizer of the inner minimization problem in (A.10a) is

$$y^*(\lambda) = \frac{w}{1 + \lambda}.$$

Furthermore, this minimizer  $y^*(\lambda)$  is unique for any  $\lambda \geq 0$  because the objective function of the inner minimization over  $y$  in (A.10a) is strictly convex in  $y$ . Substituting this optimal solution into the objective of (A.10a) leads to (A.10b), and substituting the value of  $w$  by  $x - \hat{\mu}$  leads to the reformulation (A.9).

We now study the maximizer  $\lambda^*$  of problem (A.10b). The Karush-Kuhn-Tucker condition asserts that there exists  $\gamma^* \in \mathbb{R}_+$  such that  $(\lambda^*, \gamma^*)$  satisfy the system of algebraic equations

$$\begin{cases} (1 + \lambda^*)^{-2} w^\top \Omega w - \gamma^* &= \varepsilon \\ \gamma^* \lambda^* &= 0 \\ \gamma^* \geq 0, \lambda^* &\geq 0. \end{cases}$$

If  $w^\top \Omega w \leq \varepsilon$ , then  $\lambda^* = 0$ . If  $w^\top \Omega w > \varepsilon$ , then

$$\lambda^* = \sqrt{\frac{w^\top \Omega w}{\varepsilon}} - 1.$$

In both cases,  $\lambda^*$  is unique. Substituting the value of  $\lambda^*$  into the objective function of (A.10b) gives the analytical expression for  $g(\Omega)$ .

We note that when  $\varepsilon = 0$ , we have  $g(\Omega) = (x - \hat{\mu})^\top \Omega (x - \hat{\mu})$ . The expressions for  $\lambda^*$  remain still valid in this case by taking the limit as  $\varepsilon \downarrow 0$ . Finally, the uniqueness of  $\mu^*$  follows from the uniqueness of  $\lambda^*$  and  $y^*(\lambda)$  obtained previously. The proof is thus completed.  $\square$

We are now ready to prove Theorem 3.1 in the main text.

*Proof of Theorem 3.1.* The optimistic nonparametric score evaluation problem can be decomposed using a two-layer formulation (6) as

$$\sup_{\mathbb{Q} \in \mathbb{B}_\rho(\hat{\mathbb{P}})} \mathbb{Q}(\{x\}) = \sup_{(\mu, \Sigma) \in \mathcal{U}_\rho(\hat{\mu}, \hat{\Sigma})} \sup_{\mathbb{Q} \in \mathcal{M}(\mu, \Sigma)} \mathbb{Q}(\{x\}).$$

Using the result from Marshall & Olkin (1960) or Bertsimas & Popescu (2005, Theorem 6.1) to reformulate the inner supremum problem, we have

$$\sup_{\mathbb{Q} \in \mathcal{M}(\mu, \Sigma)} \mathbb{Q}(\{x\}) = \frac{1}{1 + (\mu - x)^\top \Sigma^{-1} (\mu - x)},$$

where the supremum is attained thanks to Bertsimas & Popescu (2005, Theorem 6.2) because the set  $\{x\}$  is a singleton, and hence it is closed. This establishes equality (8a), where the maximization operator in the right hand side of (8a) is justified because  $\mathcal{U}_\rho(\hat{\mu}, \hat{\Sigma})$  is compact by Lemma C.1 and the objective function is continuous over  $\mathcal{U}_\rho(\hat{\mu}, \hat{\Sigma})$ .

It remains to find the optimal solution  $(\mu^*, \Sigma^*)$  that solves the maximization problem (8a). If  $x = \hat{\mu}$  then the optimal value of problem (8a) is trivially 0. It suffices to consider the case when  $x \neq \hat{\mu}$ . Define  $\bar{\rho} \triangleq \rho + d + \log \det \hat{\Sigma}$ . Using a reparametrization  $\Omega \leftarrow \Sigma^{-1}$ , the maximizer  $(\mu^*, \Sigma^*)$  also solves

$$\begin{aligned} \min \quad & (\mu - x)^\top \Omega (\mu - x) \\ \text{s. t.} \quad & \mu \in \mathbb{R}^d, \Omega \in \mathbb{S}_{++}^d \\ & (\mu - \hat{\mu})^\top \Omega (\mu - \hat{\mu}) + \text{Tr} [\hat{\Sigma} \Omega] - \log \det \Omega \leq \bar{\rho}. \end{aligned} \quad (\text{A.11})$$

This optimization problem with decision variables  $(\mu, \Omega)$  is still a non-convex optimization problem because of the multiplication terms between  $\mu$  and  $\Omega$ . However, it can be re-expressed as

$$\begin{aligned} \min \quad & \min (\mu - x)^\top \Omega (\mu - x) \\ \text{s. t.} \quad & \mu \in \mathbb{R}^d, (\mu - \hat{\mu})^\top \Omega (\mu - \hat{\mu}) \leq \bar{\rho} - \text{Tr} [\hat{\Sigma} \Omega] + \log \det \Omega \\ \text{s. t.} \quad & \Omega \in \mathbb{S}_{++}^d, \text{Tr} [\hat{\Sigma} \Omega] - \log \det \Omega \leq \bar{\rho}, \end{aligned}$$

where we note that the constraint  $\text{Tr} [\hat{\Sigma} \Omega] - \log \det \Omega \leq \bar{\rho}$  is redundant, but it is added to ensure that the inner problem over  $\mu$  is feasible for any feasible value of  $\Omega$  in the outer problem. Applying Lemma C.2 to solve the inner problem over  $\mu$  for any given  $\Omega \in \mathbb{S}_{++}^d$ , problem (A.11) is equivalent to

$$\begin{aligned} \min \quad & \max_{\lambda \geq 0} -\lambda(\bar{\rho} - \text{Tr} [\hat{\Sigma} \Omega] + \log \det \Omega) + \frac{\lambda}{1+\lambda} (x - \hat{\mu})^\top \Omega (x - \hat{\mu}) \\ \text{s. t.} \quad & \Omega \in \mathbb{S}_{++}^d, \text{Tr} [\hat{\Sigma} \Omega] - \log \det \Omega \leq \bar{\rho}. \end{aligned}$$

For any  $\hat{\Sigma} \in \mathbb{S}_{++}^d$  and  $\bar{\rho} = \rho + d + \log \det \hat{\Sigma} \in \mathbb{R}$ , the feasible set  $\{\Omega \in \mathbb{S}_{++}^d : \text{Tr} [\hat{\Sigma} \Omega] - \log \det \Omega \leq \bar{\rho}\}$  is compact<sup>1</sup> and convex. Moreover, the objective function is convex in  $\Omega$  and concave in  $\lambda$ . Applying Sion's minimax theorem (Sion, 1958), we can interchange the operators and obtain an equivalent problem

$$\begin{aligned} \max_{\lambda \geq 0} \quad & \min -\lambda(\bar{\rho} - \text{Tr} [\hat{\Sigma} \Omega] + \log \det \Omega) + \frac{\lambda}{1+\lambda} (x - \hat{\mu})^\top \Omega (x - \hat{\mu}) \\ \text{s. t.} \quad & \Omega \in \mathbb{S}_{++}^d, \text{Tr} [\hat{\Sigma} \Omega] - \log \det \Omega \leq \bar{\rho}. \end{aligned}$$

For any  $\lambda \geq 0$ , we can use a duality argument to reformulate the inner minimization, and we obtain the equivalent problem

$$\begin{aligned} & \max_{\lambda \geq 0} \inf_{\Omega \in \mathbb{S}_{++}^d} \max_{\nu \geq 0} -(\lambda + \nu)\bar{\rho} - (\lambda + \nu) \log \det \Omega + (\lambda + \nu) \text{Tr} [\Omega \hat{\Sigma}] + \frac{\lambda}{1+\lambda} (x - \hat{\mu})^\top \Omega (x - \hat{\mu}) \\ & = \max_{\substack{\lambda \geq 0 \\ \nu \geq 0}} \inf_{\Omega \in \mathbb{S}_{++}^d} -(\lambda + \nu)\bar{\rho} - (\lambda + \nu) \log \det \Omega + (\lambda + \nu) \text{Tr} [\Omega \hat{\Sigma}] + \frac{\lambda}{1+\lambda} (x - \hat{\mu})^\top \Omega (x - \hat{\mu}), \end{aligned}$$

where the interchange of the infimum operator with the innermost maximum operator is justified thanks to Bertsekas (2009, Proposition 5.5.4). Using a change of variables  $\gamma \leftarrow \lambda + \nu$ , problem (A.11) is equivalent to

$$\max_{\gamma \geq \lambda \geq 0} \left\{ \varphi(\gamma, \lambda) \triangleq \inf_{\Omega \in \mathbb{S}_{++}^d} -\gamma\bar{\rho} - \gamma \log \det \Omega + \gamma \text{Tr} [\Omega \hat{\Sigma}] + \frac{\lambda}{1+\lambda} (x - \hat{\mu})^\top \Omega (x - \hat{\mu}) \right\}.$$

If  $\gamma = \lambda = 0$ , we have  $\varphi(0, 0) = 0$ . For any  $\lambda \geq 0$  and  $\gamma \geq \lambda$  such that  $\gamma > 0$ , the inner minimization admits the optimal solution

$$\Omega^*(\lambda, \gamma) = \left( \hat{\Sigma} + \frac{\lambda}{\gamma(1+\lambda)} (x - \hat{\mu})(x - \hat{\mu})^\top \right)^{-1}. \quad (\text{A.12})$$

Furthermore, because  $\gamma > 0$ , the inner minimization problem has a strictly convex objective function over  $\mathbb{S}_{++}^d$ , in this case, the minimizer  $\Omega^*(\lambda, \gamma)$  is unique. By substituting the value of the minimizer  $\Omega^*(\lambda, \gamma)$ , we obtain

$$\begin{aligned} \varphi(\gamma, \lambda) &= -\gamma\rho + \gamma \log \det \left( I_d + \frac{\lambda}{\gamma(1+\lambda)} \hat{\Sigma}^{-\frac{1}{2}} (x - \hat{\mu})(x - \hat{\mu})^\top \hat{\Sigma}^{-\frac{1}{2}} \right) \\ &= -\gamma\rho + \gamma \log \left( 1 + \frac{\lambda}{\gamma(1+\lambda)} (x - \hat{\mu})^\top \hat{\Sigma}^{-1} (x - \hat{\mu}) \right) \end{aligned}$$

where  $\hat{\Sigma}^{-\frac{1}{2}}$  denotes the inverse of the unique principal square root of  $\hat{\Sigma}$ . In the second equality, we have used Bernstein (2009, Fact 2.16.3) which implies that

$$\det(I_d + ab^\top) = 1 + b^\top a \quad \forall (a, b) \in \mathbb{R}^d \times \mathbb{R}^d.$$

<sup>1</sup>Compactness follows from a reasoning similar to the proof of Lemma C.1, thus the details are omitted.

In the next step, we show that for any  $\gamma \geq \lambda$ , the optimal solution for the variable  $\lambda$  is  $\lambda^*(\gamma) = \gamma$ . To this end, rewrite the above optimization problem as a two-layer optimization problem

$$\max_{\gamma \geq 0} \max_{\substack{\lambda \geq 0 \\ \lambda \leq \gamma}} \varphi(\gamma, \lambda).$$

This claim is trivial if  $\gamma = 0$  because in this case, the only feasible solution for  $\lambda$  is  $\lambda^*(0) = 0$ . If  $\gamma > 0$ , the gradient of  $\varphi$  in the variable  $\lambda$  satisfies

$$\frac{\partial \varphi}{\partial \lambda} = \frac{\gamma(x - \hat{\mu})^\top \hat{\Sigma}^{-1}(x - \hat{\mu})}{(1 + \lambda)(\gamma(1 + \lambda) + \lambda(x - \hat{\mu})^\top \hat{\Sigma}^{-1}(x - \hat{\mu}))} \geq 0 \quad \forall \lambda \in [0, \gamma],$$

which implies that at optimality, we have  $\lambda^*(\gamma) = \gamma$ . Thus, we can eliminate the variable  $\lambda$  and obtain the equivalent univariate optimization problem

$$\max_{\gamma \geq 0} -\gamma\rho + \gamma \log \left( 1 + \frac{1}{1 + \gamma} (x - \hat{\mu})^\top \hat{\Sigma}^{-1}(x - \hat{\mu}) \right).$$

Converting this problem into a minimization problem gives the formulation (8d). By studying the objective function of (8d) and its gradient and Hessian<sup>2</sup>, one can verify that this objective function is strictly convex and it tends to infinity as  $\gamma$  goes to infinity. This implies that the minimizer  $\gamma^*$  of (8d) exists and is unique. Let  $\gamma^*$  be the minimizer of (8d), one can reconstruct  $\Sigma^*$  from (A.12) and  $\mu^*$  from Lemma C.2, which gives the expression (8c). This observation completes the proof.  $\square$

## D. Proof of Section 4

*Proof of Theorem 4.1.* Evaluating the optimistic score under the Gaussian assumption is equivalent to solving a non-convex minimization problem

$$\min \left\{ (\mu - x)^\top \Sigma^{-1}(\mu - x) + \log \det \Sigma : (\mu, \Sigma) \in \mathcal{U}_\rho(\hat{\mu}, \hat{\Sigma}) \right\}, \quad (\text{A.13})$$

where the minimization operator is justified by the compactness of the uncertainty set  $\mathcal{U}_\rho(\hat{\mu}, \hat{\Sigma})$  in Lemma C.1. Define  $\bar{\rho} \triangleq \rho + d + \log \det \hat{\Sigma}$ . Using a reparametrization  $\Omega \leftarrow \Sigma^{-1}$ , problem (A.13) admits an equivalent formulation

$$\begin{aligned} \min \quad & (\mu - x)^\top \Omega (\mu - x) - \log \det \Omega \\ \text{s. t.} \quad & \mu \in \mathbb{R}^d, (\mu - \hat{\mu})^\top \Omega (\mu - \hat{\mu}) \leq \bar{\rho} - \text{Tr} [\hat{\Sigma} \Omega] + \log \det \Omega \\ \text{s. t.} \quad & \Omega \in \mathbb{S}_{++}^d, \text{Tr} [\hat{\Sigma} \Omega] - \log \det \Omega \leq \bar{\rho}, \end{aligned}$$

where we emphasize that the constraint  $\text{Tr} [\hat{\Sigma} \Omega] - \log \det \Omega \leq \bar{\rho}$  is redundant to ensure the feasibility of the inner problem over  $\mu$  for each admissible  $\Omega$ . Applying Lemma C.2 to solve the inner problem over  $\mu$  for any given  $\Omega \in \mathbb{S}_{++}^d$ , problem (A.13) is equivalent to

$$\begin{cases} \min \max_{\lambda \geq 0} -\lambda(\bar{\rho} - \text{Tr} [\hat{\Sigma} \Omega]) - (\lambda + 1) \log \det \Omega + \frac{\lambda}{1 + \lambda} (x - \hat{\mu})^\top \Omega (x - \hat{\mu}) \\ \text{s. t.} \quad \Omega \in \mathbb{S}_{++}^d, \text{Tr} [\hat{\Sigma} \Omega] - \log \det \Omega \leq \bar{\rho}. \end{cases}$$

Follow a similar steps as in the proof of Theorem 3.1, we find that problem (A.13) is equivalent to

$$\max_{\gamma \geq \lambda \geq 0} \left\{ \varphi(\gamma, \lambda) \triangleq \inf_{\Omega \in \mathbb{S}_{++}^d} -\gamma \bar{\rho} - (\gamma + 1) \log \det \Omega + \gamma \text{Tr} [\Omega \hat{\Sigma}] + \frac{\lambda}{1 + \lambda} (x - \hat{\mu})^\top \Omega (x - \hat{\mu}) \right\}.$$

For any  $\lambda \geq 0$  and  $\gamma \geq \lambda$  such that  $\gamma > 0$ , the inner minimization admits the optimal solution

$$\Omega^*(\lambda, \gamma) = \left( \frac{\gamma}{1 + \gamma} \hat{\Sigma} + \frac{\lambda}{(1 + \gamma)(1 + \lambda)} (x - \hat{\mu})(x - \hat{\mu})^\top \right)^{-1}, \quad (\text{A.14})$$

<sup>2</sup>The closed form expressions can be found in Section E.

By substituting the value of the minimizer  $\Omega^*(\lambda, \gamma)$ , we obtain

$$\varphi(\gamma, \lambda) = (d + \log \det \widehat{\Sigma}) - \gamma\rho - d(\gamma + 1) \log \left(1 + \frac{1}{\gamma}\right) + (1 + \gamma) \log \left(1 + \frac{\lambda(x - \widehat{\mu})^\top \widehat{\Sigma}^{-1}(x - \widehat{\mu})}{\gamma(1 + \lambda)}\right),$$

If  $\gamma = \lambda = 0$ , we have  $\varphi(0, 0) = -\infty$  because the objective value in this case tends to  $-\infty$  as  $\Omega$  tends to  $+\infty$ . Thus without loss of optimality, we can omit the variable  $\gamma = \lambda = 0$  from the outer maximization problem because this set of solution is never optimal. Problem (A.13) is hence equivalent to the following two-layer optimization problem

$$\max_{\gamma > 0} \max_{0 \leq \lambda \leq \gamma} \varphi(\gamma, \lambda), \quad (\text{A.15})$$

where we emphasize that the feasible set for  $\gamma$  is over the open set  $(0, +\infty)$ . For any  $\gamma > 0$ , the gradient of  $\varphi$  in  $\lambda$  satisfies

$$\frac{\partial \varphi}{\partial \lambda} = \frac{\gamma(1 + \gamma)(x - \widehat{\mu})^\top \widehat{\Sigma}^{-1}(x - \widehat{\mu})}{\gamma(1 + \lambda) + \lambda(x - \widehat{\mu})^\top \widehat{\Sigma}^{-1}(x - \widehat{\mu})} \geq 0 \quad \forall \lambda \in [0, \gamma],$$

which implies that the inner maximization problem in (A.15) admits the optimal solution  $\lambda^*(\gamma) = \gamma$ . We thus have

$$\max_{\gamma > 0} (d + \log \det \widehat{\Sigma}) - \gamma\rho - d(\gamma + 1) \log \left(1 + \frac{1}{\gamma}\right) + (1 + \gamma) \log \left(1 + \frac{(x - \widehat{\mu})^\top \widehat{\Sigma}^{-1}(x - \widehat{\mu})}{(1 + \gamma)}\right)$$

Dropping the constant term in the objective function and converting the problem into the minimization form results in problem (11d). By studying the objective function of (11d) and its gradient and Hessian<sup>3</sup>, one can verify that this objective function is strictly convex and it tends to infinity as  $\gamma$  goes to infinity. This implies that the minimizer  $\gamma^*$  of (11d) exists and is unique. Let  $\gamma^*$  be the minimizer of (11d), one can reconstruct  $\Sigma^*$  from (A.14) and  $\mu^*$  from Lemma C.2, which give expression (11c). This finishes the proof.  $\square$

## E. Calculations of the Gradients and Hessians

Throughout this section, we use the shorthand  $\alpha = (x - \widehat{\mu})^\top \widehat{\Sigma}^{-1}(x - \widehat{\mu}) \geq 0$ . Denote momentarily by  $\varphi_1 : \mathbb{R}_+ \rightarrow \mathbb{R}$  the objective function of problem (8d), that is,

$$\varphi_1(\gamma) = \gamma\rho - \gamma \log \left(1 + \frac{\alpha}{1 + \gamma}\right).$$

The gradient and Hessian of  $\varphi_1$  are

$$\begin{aligned} \frac{\partial \varphi_1}{\partial \gamma} &= \rho - \log \left(1 + \frac{\alpha}{1 + \gamma}\right) + \frac{\gamma\alpha}{(1 + \gamma)[1 + \gamma + \alpha]}, \\ \frac{\partial^2 \varphi_1}{\partial \gamma^2} &= \frac{\alpha(2 + 2\gamma + 2\alpha + \alpha\gamma)}{(1 + \gamma)^2(1 + \gamma + \alpha)^2} \geq 0. \end{aligned}$$

Now, denote momentarily by  $\varphi_2 : \mathbb{R}_{++} \rightarrow \mathbb{R}$  the objective function of problem (11d), that is,

$$\varphi_2(\gamma) = \gamma\rho + d(\gamma + 1) \log \left(1 + \frac{1}{\gamma}\right) - (1 + \gamma) \log \left(1 + \frac{\alpha}{(1 + \gamma)}\right).$$

The gradient and Hessian of  $\varphi_2$  are

$$\begin{aligned} \frac{\partial \varphi_2}{\partial \gamma} &= \rho + d \left[ \log \left(1 + \frac{1}{\gamma}\right) - \frac{1}{\gamma} \right] - \left[ \log \left(1 + \frac{\alpha}{1 + \gamma}\right) - \frac{\alpha}{1 + \gamma + \alpha} \right], \\ \frac{\partial^2 \varphi_2}{\partial \gamma^2} &= \frac{d}{\gamma^2(1 + \gamma)} + \frac{\alpha^2}{(1 + \gamma + \alpha)^2(1 + \gamma)} \geq 0. \end{aligned}$$

<sup>3</sup>The closed form expressions can be found in Section E.

## References

- Bernstein, D. S. *Matrix Mathematics: Theory, Facts, and Formulas*. Princeton University Press, 2009.
- Bertsekas, D. *Convex Optimization Theory*. Athena Scientific, 2009.
- Bertsimas, D. and Popescu, I. Optimal inequalities in probability theory: A convex optimization approach. *SIAM Journal on Optimization*, 15(3):780–804, 2005.
- Marshall, A. W. and Olkin, I. Multivariate Chebyshev inequalities. *The Annals of Mathematical Statistics*, 31(4):1001–1014, 1960.
- Sion, M. On general minimax theorems. *Pacific Journal of Mathematics*, 8(1):171–176, 1958.
- van der Vaart, A. W. *Asymptotic Statistics*. Cambridge University Press, 1998.
